# Supplementary material
Source: HighWire-hosted journal article supplement (https://erj.ersjournals.com/content/54/4/1901805)
Supplement: inline-supplementary-material-1 [file inline-supplementary-material-1.pdf]

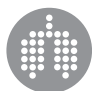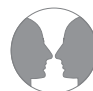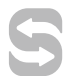

SHAREABLE PDF

# Regarding epithelial dysregulation in obese severe asthmatics with gastro-oesophageal reflux

Jeanne-Marie Perotin, Ratko Djukanovic and Donna E. Davies

**Affiliation:** NIHR Southampton Biomedical Research Centre, Clinical and Experimental Sciences, Faculty of Medicine, University of Southampton, Southampton, UK.

**Correspondence:** Jeanne-Marie Perotin, NIHR Southampton Biomedical Research Centre, Clinical and Experimental Sciences, Faculty of Medicine, University of Southampton, mailpoint 810, Level F, Sir Henry Wellcome Laboratories, South Block, Southampton University Hospital, Southampton, SO16 6YD, UK. E-mail: j-m.perotin-collard@soton.ac.uk

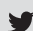

@ERSpublications

OGP phenotype is not characterised by obstructive sleep apnoea <http://bit.ly/2kv2CKE>

**Cite this article as:** Perotin J-M, Djukanovic R, Davies DE. Regarding epithelial dysregulation in obese severe asthmatics with gastro-oesophageal reflux. *Eur Respir J* 2019; 54: 1901805 [<https://doi.org/10.1183/13993003.01805-2019>].

This single-page version can be shared freely online.

*From the authors:*

We thank C. Ward and Z.J. Kharaba for their interesting comments on the OGP endotype of severe asthma that we recently described [1].
